# Supplementary material
Source: MDPI journal article supplement (https://www.mdpi.com/2073-4395/13/4/1028)
Supplement: s1 [file s1]

**Table S1.** Residue properties of winter crops before rice season in 2019

| Rotation        | Components   | Residue DM <sup>1</sup><br>(kg m <sup>-2</sup> ) | Residue N<br>(g m <sup>-2</sup> ) | Residue C<br>(g m <sup>-2</sup> ) | C/N<br>ratio | N (%) | C (%) |
|-----------------|--------------|--------------------------------------------------|-----------------------------------|-----------------------------------|--------------|-------|-------|
| RP <sup>2</sup> | Rice straw   | 2.09                                             | 27.7                              | 708.8                             |              | 1.3   | 33.9  |
|                 | Roots, straw | 0.09                                             | 1.8                               | 25.2                              |              | 2.0   | 28.1  |
|                 | Total        | 2.18a <sup>5</sup>                               | 29.4a                             | 734.0a                            | 27.9         |       |       |
| RW <sup>3</sup> | Roots        | 0.10                                             | 0.6                               | 17.2                              |              | 0.7   | 17.4  |
|                 | Straw        | 0.39                                             | 2.4                               | 135.8                             |              | 0.6   | 34.6  |
|                 | Total        | 0.49b                                            | 3.1c                              | 153.0b                            | 50.1         |       |       |
| RC <sup>4</sup> | Roots        | 0.04                                             | 0.9                               | 10.8                              |              | 2.1   | 26.5  |
|                 | Straw        | 0.50                                             | 15.1                              | 163.1                             |              | 3.0   | 32.8  |
|                 | Total        | 0.54b                                            | 16.0b                             | 173.9b                            | 10.9         |       |       |

<sup>1</sup>DM: dry matter;<sup>2</sup>RP: rice-potato with rice straw mulch;<sup>3</sup>RW: rice-wheat;<sup>4</sup>RC: rice-green manure (Chinese milk vetch).<sup>5</sup>Different lower letters in the same column indicate statistical significance at  $P = 0.05$ .

The same as below

**Table S2.** Rice biomass and grain yield in the last four years under rotations

| Rotation        | Biomass (g m <sup>-2</sup> ) |         |         |         | yield (t ha <sup>-1</sup> ) |       |       |      |
|-----------------|------------------------------|---------|---------|---------|-----------------------------|-------|-------|------|
|                 | 2016                         | 2017    | 2018    | 2019    | 2016                        | 2017  | 2018  | 2019 |
| RF <sup>1</sup> | 1539.5c                      | 1811.9b | 1543.5b | 1411.3a | 8.5b                        | 9.8c  | 7.7c  | 7.7a |
| RP              | 1772.8a                      | 1895.1a | 1884.3a | 1636.5a | 10.0a                       | 10.7a | 8.8a  | 8.6a |
| RW              | 1675.6b                      | 1698.4a | 1821.2a | 1322.4a | 9.6a                        | 9.9ab | 8.3b  | 7.8a |
| RC              | 1756.6a                      | 1832.6a | 1867.9a | 1651.5a | 9.3ab                       | 10.2b | 8.5ab | 8.5a |

<sup>1</sup>RF: Rice-fallow.

The same as below

**Table S3.** Percentage share of total soil C and N content in investigated layers in ratio total stock in 0-50 cm (%)

| Soil depth (cm) | Rotation | SOC <sub>D</sub> <sup>1</sup> | TN <sub>D</sub> <sup>2</sup> | AN <sub>D</sub> <sup>3</sup> |
|-----------------|----------|-------------------------------|------------------------------|------------------------------|
| 0–10            | RF       | 25.9±2.6a                     | 26.0±0.6a                    | 25.4±1.6a                    |
|                 | RP       | 23.2±4.0a                     | 22.2±1.6b                    | 25.2±3.8a                    |
|                 | RW       | 23.5±2.2a                     | 24.5±1.9ab                   | 25.7±2.0a                    |
|                 | RC       | 22.3±2.4a                     | 22.5±2.8ab                   | 25.5±2.7a                    |
| 10–20           | RF       | 26.8±1.8a                     | 28.1±2.6a                    | 24.0±3.1b                    |
|                 | RP       | 23.8±1.2b                     | 28.1±0.7a                    | 28.1±1.9ab                   |
|                 | RW       | 26.1±1.3ab                    | 28.6±1.3a                    | 30.9±2.5a                    |
|                 | RC       | 24.4±0.6ab                    | 25.9±1.1a                    | 28.0±1.0ab                   |
| 20–30           | RF       | 30.6±3.9a                     | 25.8±2.5a                    | 26.3±1.3a                    |
|                 | RP       | 27.3±2.3ab                    | 28.3±3.2a                    | 24.7±4.0a                    |

|       |    |            |           |           |
|-------|----|------------|-----------|-----------|
| 30–40 | RW | 23.9±3.0b  | 27.4±3.1a | 24.5±4.1a |
|       | RC | 25.5±2.2ab | 27.3±2.0a | 26.0±2.3a |
|       | RF | 9.0±0.6c   | 9.1±1.0c  | 14.4±1.2a |
|       | RP | 20.6±3.7a  | 13.6±1.0b | 15.7±1.8a |
| 40–50 | RW | 14.1±1.3b  | 10.9±1.8c | 14.1±1.8a |
|       | RC | 17.3±1.0ab | 17.1±0.7a | 13.5±1.0a |
|       | RF | 7.6±0.4c   | 11.0±1.4a | 9.9±1.5a  |
|       | RP | 5.1±0.2d   | 7.8±0.3b  | 6.3±0.8bc |
|       | RW | 12.4±1.6a  | 8.6±1.4b  | 4.8±0.5d  |
|       | RC | 10.5±1.1b  | 7.2±0.2b  | 7.0±0.6b  |

<sup>1</sup>SOC<sub>D</sub>: Soil organic carbon density;

<sup>2</sup>TN<sub>D</sub>: Total nitrogen density;

<sup>3</sup>AN<sub>D</sub>: Available nitrogen density;

<sup>4</sup>Different lowercase letters represent the statistical significance at  $P = 0.05$  among rotations within the same soil layer.

The same as below

**Table S4.** The stratification ratios of SOC, TN, and AN densities

|                        | Rotation | SOC <sub>D</sub> | TN <sub>D</sub> | AN <sub>D</sub> |
|------------------------|----------|------------------|-----------------|-----------------|
| SR <sub>10–20 cm</sub> | RF       | 0.97±0.11a       | 0.93±0.09a      | 1.08±0.23a      |
|                        | RP       | 0.98±0.22a       | 0.79±0.06a      | 0.90±0.18a      |
|                        | RW       | 0.90±0.06a       | 0.86±0.11a      | 0.83±0.05a      |
|                        | RC       | 0.91±0.09a       | 0.87±0.15a      | 0.92±0.13a      |
| SR <sub>20–30 cm</sub> | RF       | 0.86±0.20a       | 1.01±0.11a      | 0.97±0.11a      |
|                        | RP       | 0.85±0.15a       | 0.79±0.13a      | 1.05±0.27a      |
|                        | RW       | 1.00±0.23a       | 0.90±0.09a      | 1.08±0.25a      |
|                        | RC       | 0.88±0.17a       | 0.84±0.17a      | 0.99±0.19a      |
| SR <sub>30–40 cm</sub> | RF       | 2.89±0.31a       | 2.87±0.27a      | 1.77±0.06a      |
|                        | RP       | 1.18±0.43b       | 1.63±0.07b      | 1.63±0.40a      |
|                        | RW       | 1.68±0.21b       | 2.30±0.57a      | 1.84±0.26a      |
|                        | RC       | 1.29±0.15b       | 1.32±0.15b      | 1.90±0.26a      |
| SR <sub>40–50 cm</sub> | RF       | 3.38±0.20b       | 2.38±0.24a      | 2.59±0.24c      |
|                        | RP       | 4.55±0.92a       | 2.83±0.18a      | 4.00±0.21b      |
|                        | RW       | 1.92±0.31c       | 2.92±0.72a      | 5.39±0.84a      |
|                        | RC       | 2.14±0.40c       | 3.14±0.45a      | 3.66±0.07b      |
